# Supplementary material
Source: MDPI journal article supplement (https://www.mdpi.com/2073-4433/13/5/789)
Supplement: s1 [file s1]

# Supplementary Materials: Self-Rated Health, Life Balance and Feeling of Empowerment When Facing Impacts of Permafrost Thaw– a Case Study from Northern Canada

Ulla Timlin <sup>1\*</sup>, Justine Ramage <sup>2,3</sup>, Susanna Gartler <sup>4</sup>, Tanja Nordström <sup>1</sup> and Arja Rautio <sup>1,5</sup>

**Table S1.** Variables of interest (self-rated) and perceived environmental factors.

|                                                    | Well-being |      |           |      |
|----------------------------------------------------|------------|------|-----------|------|
|                                                    | OK, good   |      | very good |      |
|                                                    | n          | (%)  | n         | (%)  |
| How often do you use your natural environment for: |            |      |           |      |
| hunting (n = 53)                                   |            |      |           |      |
| never, rarely                                      | 13         | (34) | 1         | (7)  |
| sometimes, very often                              | 25         | (66) | 14        | (93) |
| fishing activities (n = 51)                        |            |      |           |      |
| never, rarely                                      | 12         | (32) | 3         | (21) |
| sometimes, very often                              | 25         | (68) | 11        | (79) |
| picking mushrooms, berries (n = 53)                |            |      |           |      |
| never, rarely                                      | 7          | (18) | 2         | (13) |
| sometimes, very often                              | 31         | (82) | 13        | (87) |
| recreational activities (n = 53)                   |            |      |           |      |
| never, rarely                                      | 18         | (47) | 5         | (33) |
| sometimes, very often                              | 20         | (53) | 10        | (67) |
| economic activities (n = 53)                       |            |      |           |      |
| never, rarely                                      | 36         | (95) | 12        | (80) |
| sometimes, very often                              | 2          | (5)  | 3         | (20) |
| scientific activities (n = 53)                     |            |      |           |      |
| never, rarely                                      | 27         | (71) | 10        | (67) |
| sometimes, very often                              | 11         | (29) | 3         | (33) |
| Quality of life                                    |            |      |           |      |
|                                                    | OK, good   |      | very good |      |
|                                                    | n          | (%)  | n         | (%)  |
| How often do you use your natural environment for: |            |      |           |      |
| hunting (n = 52)                                   |            |      |           |      |
| never, rarely                                      | 11         | (31) | 3         | (18) |
| sometimes, very often                              | 24         | (69) | 14        | (82) |
| fishing (n = 50)                                   |            |      |           |      |
| never, rarely                                      | 11         | (31) | 4         | (27) |
| sometimes, very often                              | 24         | (69) | 11        | (73) |
| picking mushrooms, berries (n = 52)                |            |      |           |      |
| never, rarely                                      | 5          | (14) | 4         | (23) |
| sometimes, very often                              | 30         | (86) | 13        | (77) |
| recreational activities (n = 52)                   |            |      |           |      |
| never, rarely                                      | 17         | (49) | 5         | (29) |
| sometimes, very often                              | 18         | (51) | 12        | (71) |
| economic activities (n = 52)                       |            |      |           |      |
| never, rarely                                      | 33         | (94) | 14        | (82) |
| sometimes, very often                              | 2          | (6)  | 3         | (18) |
| scientific activities (n = 52)                     |            |      |           |      |
| never, rarely                                      | 25         | (71) | 11        | (65) |
| sometimes, very often                              | 10         | (29) | 6         | (35) |
| Satisfaction with life                             |            |      |           |      |
|                                                    | OK, good   |      | very good |      |
|                                                    | n          | (%)  | n         | (%)  |
| How often do you use your natural environment for: |            |      |           |      |
| hunting (n = 52)                                   |            |      |           |      |
| never, rarely                                      | 10         | (31) | 4         | (20) |
| sometimes, very often                              | 22         | (69) | 16        | (80) |
| fishing (n = 50)                                   |            |      |           |      |
| never, rarely                                      | 9          | (28) | 6         | (33) |

|                                                    |                 |       |             |      |      |      |
|----------------------------------------------------|-----------------|-------|-------------|------|------|------|
| sometimes, very often                              | 23              | (72)  | 12          | (67) |      |      |
| picking mushrooms, berries (n = 52)                |                 |       |             |      |      |      |
| never, rarely                                      | 5               | (16)  | 4           | (20) |      |      |
| sometimes, very often                              | 27              | (84)  | 16          | (80) |      |      |
| recreational activities (n = 52)                   |                 |       |             |      |      |      |
| never, rarely                                      | 15              | (50)  | 6           | (30) |      |      |
| sometimes, very often                              | 16              | (50)  | 14          | (70) |      |      |
| economic activities (n = 52)                       |                 |       |             |      |      |      |
| never, rarely                                      | 31              | (97)  | 16          | (80) |      |      |
| sometimes, very often                              | 1               | (3)   | 4           | (20) |      |      |
| scientific activities (n = 52)                     |                 |       |             |      |      |      |
| never, rarely                                      | 24              | (75)  | 12          | (60) |      |      |
| sometimes, very often                              | 8               | (25)  | 8           | (40) |      |      |
| Life balance                                       |                 |       |             |      |      |      |
|                                                    | not very strong |       | very strong |      |      |      |
|                                                    | n               | (%)   | n           | (%)  |      |      |
| How often do you use your natural environment for: |                 |       |             |      |      |      |
| hunting (n = 52)                                   |                 |       |             |      |      |      |
| never, rarely                                      | 9               | (30)  | 5           | (23) |      |      |
| sometimes, very often                              | 21              | (70)  | 17          | (77) |      |      |
| fishing (n = 50)                                   |                 |       |             |      |      |      |
| never, rarely                                      | 10              | (33)  | 5           | (25) |      |      |
| sometimes, very often                              | 20              | (67)  | 15          | (75) |      |      |
| picking berries, mushrooms (n = 52)                |                 |       |             |      |      |      |
| never, rarely                                      | 4               | (13)  | 5           | (23) |      |      |
| sometimes, very often                              | 26              | (87)  | 17          | (77) |      |      |
| recreational activities (n = 52)                   |                 |       |             |      |      |      |
| never, rarely                                      | 16              | (53)  | 6           | (27) |      |      |
| sometimes, very often                              | 14              | (47)  | 16          | (73) |      |      |
| economic activities (n = 52)                       |                 |       |             |      |      |      |
| never, rarely                                      | 29              | (97)  | 18          | (82) |      |      |
| sometimes, very often                              | 1               | (3)   | 4           | (18) |      |      |
| scientific activities (n = 52)                     |                 |       |             |      |      |      |
| never, rarely                                      | 22              | (73)  | 14          | (64) |      |      |
| sometimes, very often                              | 8               | (27)  | 6           | (36) |      |      |
| Feeling of empowerment                             |                 |       |             |      |      |      |
|                                                    | no, somewhat    |       | yes         |      |      |      |
|                                                    | n               | (%)   | n           | (%)  |      |      |
| How often do you use your natural environment for: |                 |       |             |      |      |      |
| hunting (n = 53)                                   |                 |       |             |      |      |      |
| never, rarely                                      | 11              | (35)  | 3           | (14) |      |      |
| sometimes, very often                              | 20              | (65)  | 19          | (86) |      |      |
| fishing (n = 51)                                   |                 |       |             |      |      |      |
| never, rarely                                      | 12              | (39)  | 3           | (15) |      |      |
| sometimes, very often                              | 19              | (61)  | 17          | (85) |      |      |
| picking berries, mushrooms (n = 53)                |                 |       |             |      |      |      |
| never, rarely                                      | 5               | (16)  | 4           | (18) |      |      |
| sometimes, very often                              | 26              | (84)  | 18          | (82) |      |      |
| recreational activities (n = 53)                   |                 |       |             |      |      |      |
| never, rarely                                      | 15              | (48)  | 8           | (36) |      |      |
| sometimes, very often                              | 16              | (52)  | 14          | (64) |      |      |
| economic activities (n = 53)                       |                 |       |             |      |      |      |
| never, rarely                                      | 28              | (90)  | 20          | (91) |      |      |
| sometimes, very often                              | 3               | (10)  | 2           | (9)  |      |      |
| scientific activities (n = 53)                     |                 |       |             |      |      |      |
| never, rarely                                      | 19              | (61)  | 18          | (82) |      |      |
| sometimes, very often                              | 12              | (39)  | 4           | (18) |      |      |
| Self-rated health                                  |                 |       |             |      |      |      |
|                                                    | low             |       | medium      |      | high |      |
|                                                    | n               | (%)   | n           | (%)  | n    | (%)  |
| How often do you use your natural environment for: |                 |       |             |      |      |      |
| hunting (n = 53)                                   |                 |       |             |      |      |      |
| never, rarely                                      | 2               | (100) | 11          | (27) | 1    | (10) |
| sometimes, very often                              | 0               | (0)   | 30          | (73) | 9    | (90) |
| fishing (n = 51)                                   |                 |       |             |      |      |      |
| never, rarely                                      | 2               | (100) | 10          | (26) | 3    | (30) |

|                                     |   |       |    |      |   |      |
|-------------------------------------|---|-------|----|------|---|------|
| sometimes, very often               | 0 | (0)   | 29 | (74) | 7 | (70) |
| picking berries, mushrooms (n = 53) |   |       |    |      |   |      |
| never, rarely                       | 2 | (100) | 6  | (15) | 1 | (10) |
| sometimes, very often               | 0 | (0)   | 35 | (85) | 9 | (90) |
| recreational activities (n = 53)    |   |       |    |      |   |      |
| never, rarely                       | 2 | (100) | 18 | (44) | 3 | (30) |
| sometimes, very often               | 0 | (0)   | 23 | (56) | 7 | (70) |
| economic activities (n = 53)        |   |       |    |      |   |      |
| never, rarely                       | 2 | (100) | 37 | (90) | 9 | (90) |
| sometimes, very often               | 0 | (0)   | 4  | (10) | 1 | (10) |
| scientific activities (n = 53)      |   |       |    |      |   |      |
| never, rarely                       | 2 | (100) | 26 | (63) | 9 | (90) |
| sometimes, very often               | 0 | (0)   | 15 | (37) | 1 | (10) |

**Table S2.** Variables of interest (self-rated) and perceived environmental challenges.

|                                                                                     | Well-being      |       |           |      |
|-------------------------------------------------------------------------------------|-----------------|-------|-----------|------|
|                                                                                     | OK, good        |       | very good |      |
|                                                                                     | n               | (%)   | n         | (%)  |
| How important is thawing of the frozen ground in explaining each of the following:  |                 |       |           |      |
| Challenges associated with hunting, harvesting (n = 53)                             |                 |       |           |      |
| not important, a little important                                                   | 1               | (2.5) | 2         | (13) |
| important, very important                                                           | 36              | (95)  | 13        | (87) |
| I don't know                                                                        | 1               | (2.5) | 0         | (0)  |
| Challenges associated with economic activities (n = 53)                             |                 |       |           |      |
| not important, a little important                                                   | 11              | (29)  | 7         | (47) |
| important, very important                                                           | 22              | (58)  | 7         | (47) |
| I don't know                                                                        | 5               | (13)  | 1         | (6)  |
| Challenges associated with the physical environment (n = 53)                        |                 |       |           |      |
| not important, a little important                                                   | 5               | (13)  | 0         | (0)  |
| important, very important                                                           | 31              | (82)  | 12        | (80) |
| I don't know                                                                        | 2               | (5)   | 3         | (20) |
| Challenges associated with human health (n = 53)                                    |                 |       |           |      |
| not important, a little important                                                   | 3               | (8)   | 1         | (7)  |
| important, very important                                                           | 32              | (84)  | 11        | (73) |
| I don't know                                                                        | 3               | (8)   | 3         | (20) |
| Challenges associated with culture (n = 53)                                         |                 |       |           |      |
| not important, a little important                                                   | 3               | (8)   | 1         | (7)  |
| important, very important                                                           | 35              | (92)  | 14        | (93) |
| Challenges associated with housing, buildings, roads (n = 53)                       |                 |       |           |      |
| not important, a little important                                                   | 4               | (11)  | 1         | (7)  |
| important, very important                                                           | 33              | (87)  | 14        | (93) |
| I don't know                                                                        | 1               | (2)   | 0         | (0)  |
| Do you think that thawing of the frozen ground causes problems for you? (n = 49)    |                 |       |           |      |
| no                                                                                  | 8               | (22)  | 3         | (23) |
| yes                                                                                 | 28              | (78)  | 10        | (77) |
| Have you lost some picking spots because they became flooded or submerged? (n = 46) |                 |       |           |      |
| no                                                                                  | 29              | (85)  | 8         | (67) |
| yes                                                                                 | 5               | (15)  | 4         | (33) |
|                                                                                     | Quality of life |       |           |      |
|                                                                                     | OK, good        |       | very good |      |
|                                                                                     | n               | (%)   | n         | (%)  |
| How important is thawing of the frozen ground in explaining each of the following:  |                 |       |           |      |
| Challenges associated with hunting, harvesting (n = 52)                             |                 |       |           |      |
| not important, a little important                                                   | 1               | (3)   | 2         | (12) |
| important, very important                                                           | 33              | (94)  | 15        | (88) |
| I don't know                                                                        | 1               | (3)   | 0         | (0)  |
| Challenges associated with economic activities (n = 52)                             |                 |       |           |      |
| not important, a little important                                                   | 14              | (40)  | 3         | (18) |
| important, very important                                                           | 15              | (43)  | 14        | (82) |
| I don't know                                                                        | 6               | (17)  | 0         | (0)  |
| Challenges associated with the physical environment (n = 52)                        |                 |       |           |      |

|                                                                                     |    |        |    |      |
|-------------------------------------------------------------------------------------|----|--------|----|------|
| not important, a little important                                                   | 4  | (11,5) | 0  | (0)  |
| important, very important                                                           | 27 | (77)   | 16 | (94) |
| I don't know                                                                        | 4  | (11,5) | 1  | (6)  |
| Challenges associated with human health (n = 52)                                    |    |        |    |      |
| not important, a little important                                                   | 3  | (9)    | 1  | (6)  |
| important, very important                                                           | 28 | (80)   | 14 | (82) |
| I don't know                                                                        | 4  | (11)   | 2  | (12) |
| Challenges associated with culture (n = 52)                                         |    |        |    |      |
| not important, a little important                                                   | 3  | (9)    | 1  | (6)  |
| important, very important                                                           | 32 | (91)   | 16 | (94) |
| Challenges associated with housing, buildings, roads (n = 52)                       |    |        |    |      |
| not important, a little important                                                   | 3  | (8)    | 1  | (6)  |
| important, very important                                                           | 31 | (89)   | 16 | (94) |
| I don't know                                                                        | 1  | (3)    | 0  | (0)  |
| Do you think that thawing of the frozen ground causes problems for you? (n = 48)    |    |        |    |      |
| no                                                                                  | 7  | (21)   | 4  | (27) |
| yes                                                                                 | 26 | (79)   | 11 | (73) |
| Have you lost some picking spots because they became flooded or submerged? (n = 46) |    |        |    |      |
| no                                                                                  | 27 | (84)   | 10 | (71) |
| yes                                                                                 | 5  | (16)   | 4  | (29) |
| Satisfaction with life                                                              |    |        |    |      |
| OK, good very good                                                                  |    |        |    |      |
| n (%) n (%)                                                                         |    |        |    |      |
| How important is thawing of the frozen ground in explaining each of the following:  |    |        |    |      |
| Challenges associated with hunting, harvesting (n = 52)                             |    |        |    |      |
| not important, a little important                                                   | 1  | (3)    | 2  | (10) |
| important, very important                                                           | 31 | (97)   | 17 | (85) |
| I don't know                                                                        | 0  | (0)    | 1  | (5)  |
| Challenges associated with economic activities (n = 52)                             |    |        |    |      |
| not important, a little important                                                   | 10 | (31)   | 7  | (35) |
| important, very important                                                           | 16 | (50)   | 13 | (65) |
| I don't know                                                                        | 6  | (19)   | 0  | (0)  |
| Challenges associated with the physical environment (n = 52)                        |    |        |    |      |
| not important, a little important                                                   | 4  | (13)   | 0  | (0)  |
| important, very important                                                           | 25 | (78)   | 18 | (90) |
| I don't know                                                                        | 3  | (9)    | 2  | (10) |
| Challenges associated with human health (n = 52)                                    |    |        |    |      |
| not important, a little important                                                   | 3  | (9)    | 1  | (5)  |
| important, very important                                                           | 26 | (81)   | 16 | (80) |
| I don't know                                                                        | 3  | (9)    | 3  | (15) |
| Challenges associated with culture (n = 52)                                         |    |        |    |      |
| not important, a little important                                                   | 3  | (9)    | 1  | (5)  |
| important, very important                                                           | 29 | (91)   | 19 | (95) |
| Challenges associated with housing, buildings, roads (n = 52)                       |    |        |    |      |
| not important, a little important                                                   | 3  | (9)    | 1  | (5)  |
| important, very important                                                           | 28 | (88)   | 19 | (95) |
| I don't know                                                                        | 1  | (3)    | 0  | (0)  |
| Do you think that thawing of the frozen ground causes problems for you? (n = 48)    |    |        |    |      |
| no                                                                                  | 6  | (20)   | 5  | (28) |
| yes                                                                                 | 24 | (80)   | 13 | (72) |
| Have you lost some picking spots because they became flooded or submerged? (n = 46) |    |        |    |      |
| no                                                                                  | 27 | (90)   | 10 | (63) |
| yes                                                                                 | 3  | (10)   | 6  | (37) |
| Life balance                                                                        |    |        |    |      |
| not very strong very strong                                                         |    |        |    |      |
| n (%) n (%)                                                                         |    |        |    |      |
| How important is thawing of the frozen ground in explaining each of the following:  |    |        |    |      |
| Challenges associated with hunting, harvesting (n = 52)                             |    |        |    |      |
| not important, a little important                                                   | 1  | (3)    | 2  | (9)  |

|                                                                                     |     |      |     |        |
|-------------------------------------------------------------------------------------|-----|------|-----|--------|
| important, very important                                                           | 29  | (97) | 19  | (86)   |
| I don't know                                                                        | 0   | (0)  | 1   | (5)    |
| Challenges associated with economic activities (n = 52)                             |     |      |     |        |
| not important, a little important                                                   | 10  | (33) | 7   | (32)   |
| important, very important                                                           | 15  | (50) | 14  | (64)   |
| I don't know                                                                        | 5   | (17) | 1   | (5)    |
| Challenges associated with the physical environment (n = 52)                        |     |      |     |        |
| not important, a little important                                                   | 4   | (13) | 0   | (0)    |
| important, very important                                                           | 24  | (80) | 19  | (86)   |
| I don't know                                                                        | 2   | (7)  | 3   | (14)   |
| Challenges associated with human health (n = 52)                                    |     |      |     |        |
| not important, a little important                                                   | 3   | (10) | 1   | (5)    |
| important, very important                                                           | 25  | (83) | 17  | (77)   |
| I don't know                                                                        | 2   | (7)  | 4   | (18)   |
| Challenges associated with culture (n = 52)                                         |     |      |     |        |
| not important, a little important                                                   | 3   | (10) | 1   | (4)    |
| important, very important                                                           | 27  | (90) | 21  | (96)   |
| Challenges associated with housing, buildings, roads (n = 52)                       |     |      |     |        |
| not important, a little important                                                   | 3   | (10) | 1   | (4)    |
| important, very important                                                           | 26  | (87) | 21  | (96)   |
| I don't know                                                                        | 1   | (3)  | 0   | (0)    |
| Do you think that thawing of the frozen ground causes problems for you? (n = 48)    |     |      |     |        |
| no                                                                                  | 4   | (14) | 7   | (35)   |
| yes                                                                                 | 24  | (86) | 13  | (65)   |
| Have you lost some picking spots because they became flooded or submerged? (n = 46) |     |      |     |        |
| no                                                                                  | 25  | (93) | 12  | (63)   |
| yes                                                                                 | 2   | (7)  | 7   | (37)   |
| <hr/>                                                                               |     |      |     |        |
| Feeling of empowerment                                                              |     |      |     |        |
| no, somewhat                                                                        |     | yes  |     |        |
| n                                                                                   | (%) | n    | (%) |        |
| <hr/>                                                                               |     |      |     |        |
| How important is thawing of the frozen ground in explaining each of the following:  |     |      |     |        |
| Challenges associated with hunting, harvesting (n = 53)                             |     |      |     |        |
| not important, a little important                                                   | 2   | (7)  | 1   | (4)    |
| important, very important                                                           | 28  | (90) | 21  | (96)   |
| I don't know                                                                        | 1   | (3)  | 0   | (0)    |
| Challenges associated with economic activities (n = 53)                             |     |      |     |        |
| not important, a little important                                                   | 10  | (32) | 8   | (36)   |
| important, very important                                                           | 17  | (55) | 12  | (55)   |
| I don't know                                                                        | 4   | (13) | 2   | (9)    |
| Challenges associated with the physical environment (n = 53)                        |     |      |     |        |
| not important, a little important                                                   | 2   | (6)  | 3   | (14)   |
| important, very important                                                           | 25  | (81) | 18  | (82)   |
| I don't know                                                                        | 4   | (13) | 1   | (4)    |
| Challenges associated with human health (n = 53)                                    |     |      |     |        |
| not important, a little important                                                   | 1   | (3)  | 3   | (13,5) |
| important, very important                                                           | 27  | (87) | 16  | (73)   |
| I don't know                                                                        | 3   | (10) | 3   | (13,5) |
| Challenges associated with culture (n = 53)                                         |     |      |     |        |
| not important, a little important                                                   | 1   | (3)  | 3   | (14)   |
| important, very important                                                           | 30  | (97) | 19  | (86)   |
| Challenges associated with housing, buildings, roads (n = 53)                       |     |      |     |        |
| not important, a little important                                                   | 2   | (7)  | 3   | (14)   |
| important, very important                                                           | 28  | (90) | 19  | (86)   |
| I don't know                                                                        | 1   | (3)  | 0   | (0)    |
| Do you think that thawing of the frozen ground causes problems for you? (n = 49)    |     |      |     |        |
| no                                                                                  | 7   | (25) | 4   | (19)   |
| yes                                                                                 | 21  | (75) | 17  | (81)   |
| Have you lost some picking spots because they became flooded or submerged? (n = 46) |     |      |     |        |
| no                                                                                  | 21  | (78) | 16  | (84)   |
| yes                                                                                 | 6   | (22) | 3   | (16)   |
| <hr/>                                                                               |     |      |     |        |
| Self-rated health                                                                   |     |      |     |        |

|                                                                                    | low |       | medium |       | high |       |
|------------------------------------------------------------------------------------|-----|-------|--------|-------|------|-------|
|                                                                                    | n   | (%)   | n      | (%)   | n    | (%)   |
| How important is thawing of the frozen ground in explaining each of the following: |     |       |        |       |      |       |
| Challenges associated with hunting, harvesting (n = 53)                            |     |       |        |       |      |       |
| not important, a little important                                                  | 0   | (0)   | 2      | (5)   | 1    | (10)  |
| important, very important                                                          | 2   | (100) | 38     | (93)  | 9    | (90)  |
| I don't know                                                                       | 0   | (0)   | 1      | (2)   | 0    | (0)   |
| Challenges associated with economic activities (n = 53)                            |     |       |        |       |      |       |
| not important, a little important                                                  | 0   | (0)   | 13     | (32)  | 5    | (50)  |
| important, very important                                                          | 2   | (100) | 23     | (56)  | 4    | (40)  |
| I don't know                                                                       | 0   | (0)   | 5      | (12)  | 1    | (10)  |
| Challenges associated with the physical environment (n = 53)                       |     |       |        |       |      |       |
| not important, a little important                                                  | 0   | (0)   | 3      | (7,5) | 2    | (20)  |
| important, very important                                                          | 2   | (100) | 35     | (85)  | 6    | (60)  |
| I don't know                                                                       | 0   | (0)   | 3      | (7,5) | 2    | (20)  |
| Challenges associated with human health (n = 53)                                   |     |       |        |       |      |       |
| not important, a little important                                                  | 0   | (0)   | 4      | (10)  | 0    | (0)   |
| important, very important                                                          | 2   | (100) | 32     | (78)  | 9    | (90)  |
| I don't know                                                                       | 0   | (0)   | 5      | (12)  | 1    | (10)  |
| Challenges associated with culture (n = 53)                                        |     |       |        |       |      |       |
| not important, a little important                                                  | 0   | (0)   | 4      | (10)  | 0    | (0)   |
| important, very important                                                          | 2   | (100) | 37     | (90)  | 10   | (100) |
| Challenges associated with housing, buildings, roads (n = 53)                      |     |       |        |       |      |       |
| not important, a little important                                                  | 0   | (0)   | 4      | (10)  | 1    | (10)  |
| important, very important                                                          | 2   | (100) | 36     | (88)  | 9    | (90)  |
| I don't know                                                                       | 0   | (0)   | 1      | (2)   | 0    | (0)   |
| Do you think that thawing of the frozen ground causes problems for you? (n = 49)   |     |       |        |       |      |       |
| no                                                                                 | 1   | (50)  | 7      | (19)  | 3    | (30)  |
| yes                                                                                | 1   | (50)  | 30     | (81)  | 7    | (70)  |
| Have you lost picking spots because they became flooded/submerged (n = 46)         |     |       |        |       |      |       |
| no                                                                                 | 2   | (100) | 30     | (83)  | 5    | (63)  |
| yes                                                                                | 0   | (0)   | 6      | (17)  | 3    | (37)  |

**Table S3.** Variables of interest (self-rated) and perceived environmental impacts.

|                                                                                                                                       | Well-being |      |           |       |
|---------------------------------------------------------------------------------------------------------------------------------------|------------|------|-----------|-------|
|                                                                                                                                       | OK, good   |      | very good |       |
|                                                                                                                                       | n          | (%)  | n         | (%)   |
| Over the past 10 years, thawing of the frozen ground has led to (n = 51)                                                              |            |      |           |       |
| negative changes                                                                                                                      | 33         | (89) | 13        | (93)  |
| positive changes                                                                                                                      | 4          | (11) | 1         | (7)   |
| Thawing of the frozen ground is having an impact on the ability to obtain food / other resources for daily use from the land (n = 52) |            |      |           |       |
| no                                                                                                                                    | 6          | (16) | 1         | (7)   |
| yes                                                                                                                                   | 16         | (42) | 7         | (50)  |
| somewhat                                                                                                                              | 16         | (42) | 6         | (43)  |
| Is thawing of the frozen ground connected to other problems you have or your community has? (n = 53)                                  |            |      |           |       |
| no                                                                                                                                    | 4          | (10) | 0         | (0)   |
| yes                                                                                                                                   | 25         | (66) | 9         | (60)  |
| I don't know                                                                                                                          | 9          | (24) | 6         | (40)  |
| If yes, which ones: safety problems * 1                                                                                               |            |      |           |       |
| answered to options (n = 36): this option was selected (n = 16)                                                                       | 12         | (46) | 4         | (40)  |
| If yes, which ones: infrastructure problems * 1                                                                                       |            |      |           |       |
| answered to options (n = 36): this option was selected (n = 27)                                                                       | 19         | (73) | 8         | (80)  |
| According to you, what mainly causes the thawing of the frozen ground? * 2                                                            |            |      |           |       |
| Increase in temperatures (option was selected: n = 50)                                                                                | 36         | (95) | 14        | (93)  |
| Quality of life                                                                                                                       |            |      |           |       |
|                                                                                                                                       | OK, good   |      | very good |       |
|                                                                                                                                       | n          | (%)  | n         | (%)   |
| Over the past 10 years, thawing of the frozen ground has led to (n = 50)                                                              |            |      |           |       |
| negative changes                                                                                                                      | 28         | (85) | 17        | (100) |

|                                                                                                      |    |      |    |      |
|------------------------------------------------------------------------------------------------------|----|------|----|------|
| positive changes                                                                                     | 5  | (15) | 0  | (0)  |
| Thawing of the frozen ground is having an impact on the ability to obtain food / other resources     |    |      |    |      |
| for daily use from the land (n = 51)                                                                 |    |      |    |      |
| no                                                                                                   | 6  | (17) | 1  | (6)  |
| yes                                                                                                  | 16 | (46) | 7  | (44) |
| somewhat                                                                                             | 13 | (37) | 8  | (50) |
| Is thawing of the frozen ground connected to other problems you have or your community has? (n = 52) |    |      |    |      |
| no                                                                                                   | 3  | (8)  | 1  | (6)  |
| yes                                                                                                  | 23 | (66) | 10 | (59) |
| I don't know                                                                                         | 9  | (26) | 6  | (35) |
| If yes, which ones: safety problems * 1                                                              |    |      |    |      |
| answered to options (n = 36): this option was selected (n = 16)                                      | 11 | (44) | 5  | (45) |
| If yes, which ones: infrastructure problems * 1                                                      |    |      |    |      |
| answered to options (n = 36): this option was selected (n = 27)                                      | 19 | (76) | 8  | (73) |
| According to you, what mainly causes the thawing of the frozen ground? * 2                           |    |      |    |      |
| increase in temperatures (option was selected: n = 49)                                               | 34 | (97) | 15 | (88) |
| Satisfaction with life                                                                               |    |      |    |      |
| OK, good very good                                                                                   |    |      |    |      |
| n (%) n (%)                                                                                          |    |      |    |      |
| Over the past 10 years, thawing of the frozen ground has led to (n = 50)                             |    |      |    |      |
| negative changes                                                                                     | 27 | (87) | 18 | (95) |
| positive changes                                                                                     | 4  | (13) | 1  | (5)  |
| Thawing of the frozen ground is having an impact on the ability to obtain food / other resources     |    |      |    |      |
| for daily use from the land (n = 51)                                                                 |    |      |    |      |
| no                                                                                                   | 5  | (15) | 2  | (11) |
| yes                                                                                                  | 14 | (44) | 9  | (47) |
| somewhat                                                                                             | 13 | (41) | 8  | (42) |
| Is thawing of the frozen ground connected to other problems you have or your community has? (n = 52) |    |      |    |      |
| no                                                                                                   | 4  | (12) | 0  | (0)  |
| yes                                                                                                  | 20 | (63) | 13 | (65) |
| I don't know                                                                                         | 8  | (25) | 7  | (35) |
| If yes, which ones: safety problems * 1                                                              |    |      |    |      |
| answered to options (n = 36): this option was selected (n = 16)                                      | 9  | (41) | 7  | (50) |
| If yes, which ones: infrastructure problems * 1                                                      |    |      |    |      |
| answered to options (n = 36): this option was selected (n = 27)                                      | 17 | (77) | 10 | (71) |
| According to you, what mainly causes the thawing of the frozen ground? * 2                           |    |      |    |      |
| Increase in temperatures (option was selected: n = 49)                                               | 30 | (94) | 19 | (95) |
| Life balance                                                                                         |    |      |    |      |
| not very strong very strong                                                                          |    |      |    |      |
| n (%) n (%)                                                                                          |    |      |    |      |
| Over the past 10 years, thawing of the frozen ground has led to (n = 50)                             |    |      |    |      |
| negative changes                                                                                     | 26 | (90) | 19 | (91) |
| positive changes                                                                                     | 3  | (10) | 2  | (9)  |
| Thawing of the frozen ground is having an impact on the ability to obtain food / other resources     |    |      |    |      |
| for daily use from the land (n = 51)                                                                 |    |      |    |      |
| no                                                                                                   | 6  | (20) | 1  | (5)  |
| yes                                                                                                  | 12 | (40) | 11 | (52) |
| somewhat                                                                                             | 12 | (40) | 9  | (43) |
| Is thawing of the frozen ground connected to other problems you have or your community has? (n = 52) |    |      |    |      |
| no                                                                                                   | 3  | (10) | 1  | (4)  |
| yes                                                                                                  | 21 | (70) | 12 | (55) |
| I don't know                                                                                         | 6  | (20) | 9  | (41) |
| If yes, which ones: safety problems * 1                                                              |    |      |    |      |
| answered to options (n = 36): this option was selected (n = 16)                                      | 10 | (44) | 6  | (46) |
| If yes, which ones: infrastructure problems * 1                                                      |    |      |    |      |
| answered to options (n = 36): this option was selected (n = 27)                                      | 17 | (74) | 10 | (77) |
| According to you, what mainly causes the thawing of the frozen ground? * 2                           |    |      |    |      |
| Increase in temperatures (option was selected: n = 49)                                               | 29 | (97) | 20 | (91) |
| Feeling of empowerment                                                                               |    |      |    |      |
| no, somewhat yes                                                                                     |    |      |    |      |

|                                                                                                                                       | n    |       | n      |        |
|---------------------------------------------------------------------------------------------------------------------------------------|------|-------|--------|--------|
|                                                                                                                                       | (%)  |       | (%)    |        |
| Over the past 10 years, thawing of the frozen ground has led to (n = 51)                                                              |      |       |        |        |
| negative changes                                                                                                                      | 25   | (86)  | 21     | (96)   |
| positive changes                                                                                                                      | 4    | (14)  | 1      | (4)    |
| Thawing of the frozen ground is having an impact on the ability to obtain food / other resources for daily use from the land (n = 52) |      |       |        |        |
| no                                                                                                                                    | 5    | (17)  | 2      | (9)    |
| yes                                                                                                                                   | 15   | (50)  | 8      | (36)   |
| somewhat                                                                                                                              | 10   | (33)  | 12     | (55)   |
| Is thawing of the frozen ground connected to other problems you have or your community has? (n = 53)                                  |      |       |        |        |
| no                                                                                                                                    | 1    | (3)   | 3      | (14)   |
| yes                                                                                                                                   | 19   | (61)  | 15     | (68)   |
| I don't know                                                                                                                          | 11   | (36)  | 4      | (18)   |
| If yes, which ones: safety problems * <sup>1</sup>                                                                                    |      |       |        |        |
| answered to options (n = 36): this option was selected (n = 16)                                                                       | 10   | (48)  | 6      | (40)   |
| If yes, which ones: infrastructure problems * <sup>1</sup>                                                                            |      |       |        |        |
| answered to options (n = 36): this option was selected (n = 27)                                                                       | 19   | (91)  | 8      | (53)   |
| According to you, what mainly causes the thawing of the frozen ground? * <sup>2</sup>                                                 |      |       |        |        |
| Increase in temperatures (option was selected: n = 50)                                                                                | 30   | (97)  | 20     | (91)   |
| Self-rated health                                                                                                                     |      |       |        |        |
|                                                                                                                                       | low  |       | medium |        |
|                                                                                                                                       | high |       |        |        |
|                                                                                                                                       | n    | (%)   | n      | (%)    |
| Over the past 10 years, thawing of the frozen ground has led to (n = 51)                                                              |      |       |        |        |
| negative changes                                                                                                                      | 1    | (50)  | 36     | (92)   |
| positive changes                                                                                                                      | 1    | (50)  | 3      | (8)    |
| Thawing of the frozen ground is having an impact on the ability to obtain food / other resources for daily use from the land (n = 52) |      |       |        |        |
| no                                                                                                                                    | 0    | (0)   | 7      | (17)   |
| yes                                                                                                                                   | 1    | (50)  | 19     | (48)   |
| somewhat                                                                                                                              | 1    | (50)  | 14     | (35)   |
| Is thawing of the frozen ground connected to other problems you have or your community has? (n = 53)                                  |      |       |        |        |
| no                                                                                                                                    | 0    | (0)   | 3      | (7)    |
| yes                                                                                                                                   | 1    | (50)  | 26     | (63,5) |
| I don't know                                                                                                                          | 1    | (50)  | 12     | (29,5) |
| If yes, which ones: safety problems * <sup>1</sup>                                                                                    |      |       |        |        |
| answered to options (n = 36): this option was selected (n = 16)                                                                       | 1    | (100) | 13     | (45)   |
| If yes, which ones: infrastructure problems * <sup>1</sup>                                                                            |      |       |        |        |
| answered to options (n = 36): this option was selected (n = 27)                                                                       | 1    | (100) | 22     | (76)   |
| According to you, what mainly causes the thawing of the frozen ground? * <sup>2</sup>                                                 |      |       |        |        |
| Increase in temperatures (option was selected: n = 50)                                                                                | 2    | (100) | 38     | (93)   |

\*a minimum of 15 participants chose the option reported

<sup>1</sup> Options: Financial, happiness, spiritual, safety, work, political, health, infrastructure, fresh-water supply, food storage, religious

<sup>2</sup> Options: Increase in temperatures, fires, anger from spirits, too many trails, increase in shrubs, decrease in snow depth, God, roads and housing, other (participants were asked to select two options)

**Table S4.** Variables of interest (self-rated) and perceived adaptation factors.

|                                                                                                                | Well-being |      |           |      |
|----------------------------------------------------------------------------------------------------------------|------------|------|-----------|------|
|                                                                                                                | OK, good   |      | very good |      |
|                                                                                                                | n          | (%)  | n         | (%)  |
| Do you feel that enough is being done to adapt or face the impacts related to thawing of the frozen ground by: |            |      |           |      |
| individuals (n = 53)                                                                                           |            |      |           |      |
| no                                                                                                             | 14         | (37) | 8         | (53) |
| yes                                                                                                            | 7          | (18) | 1         | (7)  |
| somewhat                                                                                                       | 17         | (45) | 6         | (40) |
| the community (n = 53)                                                                                         |            |      |           |      |



|                                                                                                                |    |        |    |        |
|----------------------------------------------------------------------------------------------------------------|----|--------|----|--------|
| no                                                                                                             | 8  | (21)   | 5  | (33)   |
| yes                                                                                                            | 16 | (42)   | 3  | (20)   |
| somewhat                                                                                                       | 14 | (37)   | 7  | (47)   |
| local authorities (n = 53)                                                                                     |    |        |    |        |
| no                                                                                                             | 10 | (26)   | 6  | (40)   |
| yes                                                                                                            | 17 | (45)   | 3  | (20)   |
| somewhat                                                                                                       | 11 | (29)   | 6  | (40)   |
| regional authorities (n = 53)                                                                                  |    |        |    |        |
| no                                                                                                             | 11 | (29)   | 2  | (13)   |
| yes                                                                                                            | 17 | (45)   | 4  | (27)   |
| somewhat                                                                                                       | 10 | (26)   | 9  | (60)   |
| national authorities (n = 53)                                                                                  |    |        |    |        |
| no                                                                                                             | 15 | (39)   | 2  | (13,3) |
| yes                                                                                                            | 17 | (45)   | 5  | (33,3) |
| somewhat                                                                                                       | 6  | (16)   | 8  | (53,3) |
| global community (n = 53)                                                                                      |    |        |    |        |
| no                                                                                                             | 13 | (34)   | 1  | (7)    |
| yes                                                                                                            | 16 | (42)   | 5  | (33)   |
| somewhat                                                                                                       | 9  | (24)   | 9  | (60)   |
| In which ways do you think your community is best prepared to adapt to thawing                                 |    |        |    |        |
| of the frozen ground? (selected the option) * 1                                                                |    |        |    |        |
| Hunting / fishing activities (n = 19)                                                                          | 12 | (32)   | 7  | (47)   |
| Traditional knowledge (n = 29)                                                                                 | 22 | (58)   | 7  | (47)   |
| The strongest need to adapt to thawing of the frozen ground in order to facilitate                             |    |        |    |        |
| day to day activities (selected the option) * 2                                                                |    |        |    |        |
| Health (n = 15)                                                                                                | 10 | (26)   | 5  | (33)   |
| Housing (n = 18)                                                                                               | 12 | (32)   | 6  | (40)   |
| Hunting / fishing activities (n = 28)                                                                          | 17 | (45)   | 11 | (73)   |
| Traditional knowledge (n = 33)                                                                                 | 22 | (58)   | 11 | (73)   |
|                                                                                                                |    |        |    |        |
| Quality of life                                                                                                |    |        |    |        |
| OK, good very good                                                                                             |    |        |    |        |
| n (%) n (%)                                                                                                    |    |        |    |        |
| Do you feel that enough is being done to adapt or face the impacts related to thawing of the frozen ground by: |    |        |    |        |
| individuals (n = 52)                                                                                           |    |        |    |        |
| no                                                                                                             | 16 | (46)   | 6  | (35)   |
| yes                                                                                                            | 6  | (17)   | 2  | (12)   |
| somewhat                                                                                                       | 13 | (37)   | 9  | (53)   |
| the community (n = 52)                                                                                         |    |        |    |        |
| no                                                                                                             | 9  | (26)   | 4  | (24)   |
| yes                                                                                                            | 14 | (40)   | 5  | (29)   |
| somewhat                                                                                                       | 12 | (34)   | 8  | (47)   |
| local authorities (n = 52)                                                                                     |    |        |    |        |
| no                                                                                                             | 10 | (28,5) | 5  | (29,5) |
| yes                                                                                                            | 15 | (43)   | 5  | (29,5) |
| somewhat                                                                                                       | 10 | (28,5) | 7  | (41)   |
| regional authorities (n = 52)                                                                                  |    |        |    |        |
| no                                                                                                             | 10 | (29)   | 2  | (12)   |
| yes                                                                                                            | 14 | (40)   | 7  | (41)   |
| somewhat                                                                                                       | 11 | (31)   | 8  | (47)   |
| national authorities (n = 52)                                                                                  |    |        |    |        |
| no                                                                                                             | 13 | (37)   | 3  | (18)   |
| yes                                                                                                            | 14 | (40)   | 8  | (47)   |
| somewhat                                                                                                       | 8  | (23)   | 6  | (35)   |
| global community (n = 52)                                                                                      |    |        |    |        |
| no                                                                                                             | 13 | (37)   | 1  | (6)    |
| yes                                                                                                            | 13 | (37)   | 7  | (41)   |
| somewhat                                                                                                       | 9  | (26)   | 9  | (53)   |
| In which ways do you think your community is best prepared to adapt to thawing                                 |    |        |    |        |
| of the frozen ground? (selected the option) * 1                                                                |    |        |    |        |
| Hunting / fishing activities (n = 19)                                                                          | 13 | (37)   | 6  | (35)   |
| traditional knowledge (n = 28)                                                                                 | 20 | (57)   | 8  | (47)   |

|                                                                                                                |    |        |    |      |
|----------------------------------------------------------------------------------------------------------------|----|--------|----|------|
| The strongest need to adapt to thawing of the frozen ground in order to facilitate                             |    |        |    |      |
| day to day activities (selected the option) * 2                                                                |    |        |    |      |
| Health (n = 15)                                                                                                | 9  | (26)   | 6  | (35) |
| Housing (n = 18)                                                                                               | 11 | (31)   | 7  | (41) |
| Hunting / fishing activities (n = 27)                                                                          | 18 | (51)   | 9  | (53) |
| Traditional knowledge (n = 32)                                                                                 | 17 | (49)   | 15 | (88) |
| Satisfaction with life                                                                                         |    |        |    |      |
| OK, good very good                                                                                             |    |        |    |      |
| n (%) n (%)                                                                                                    |    |        |    |      |
| Do you feel that enough is being done to adapt or face the impacts related to thawing of the frozen ground by: |    |        |    |      |
| individuals (n = 52)                                                                                           |    |        |    |      |
| no                                                                                                             | 13 | (40,5) | 9  | (45) |
| yes                                                                                                            | 6  | (19)   | 2  | (10) |
| somewhat                                                                                                       | 13 | (40,5) | 9  | (45) |
| the community (n = 52)                                                                                         |    |        |    |      |
| no                                                                                                             | 8  | (25)   | 5  | (25) |
| yes                                                                                                            | 14 | (44)   | 5  | (25) |
| somewhat                                                                                                       | 10 | (31)   | 10 | (50) |
| local authorities (n = 52)                                                                                     |    |        |    |      |
| no                                                                                                             | 9  | (28)   | 6  | (30) |
| yes                                                                                                            | 14 | (44)   | 6  | (30) |
| somewhat                                                                                                       | 9  | (28)   | 8  | (40) |
| regional authorities (n = 52)                                                                                  |    |        |    |      |
| no                                                                                                             | 10 | (31)   | 2  | (10) |
| yes                                                                                                            | 15 | (47)   | 6  | (30) |
| somewhat                                                                                                       | 7  | (22)   | 12 | (60) |
| national authorities (n = 52)                                                                                  |    |        |    |      |
| no                                                                                                             | 12 | (37)   | 4  | (20) |
| yes                                                                                                            | 14 | (44)   | 8  | (40) |
| somewhat                                                                                                       | 6  | (19)   | 8  | (40) |
| global community (n = 52)                                                                                      |    |        |    |      |
| no                                                                                                             | 12 | (37)   | 2  | (10) |
| yes                                                                                                            | 13 | (41)   | 7  | (35) |
| somewhat                                                                                                       | 7  | (22)   | 11 | (55) |
| In which ways do you think your community is best prepared to adapt to thawing                                 |    |        |    |      |
| of the frozen ground? (selected the option) * 1                                                                |    |        |    |      |
| Hunting / fishing activities (n = 19)                                                                          | 13 | (41)   | 6  | (30) |
| Traditional knowledge (n = 28)                                                                                 | 16 | (50)   | 12 | (60) |
| The strongest need to adapt to thawing of the frozen ground in order to facilitate                             |    |        |    |      |
| day to day activities (selected the option) * 2                                                                |    |        |    |      |
| Health (n = 15)                                                                                                | 8  | (25)   | 7  | (35) |
| Housing (n = 18)                                                                                               | 11 | (34)   | 7  | (35) |
| Hunting / fishing activities (n = 27)                                                                          | 17 | (53)   | 10 | (50) |
| Traditional knowledge (n = 32)                                                                                 | 15 | (47)   | 17 | (85) |
| Life balance                                                                                                   |    |        |    |      |
| not very strong very strong                                                                                    |    |        |    |      |
| n (%) n (%)                                                                                                    |    |        |    |      |
| Do you feel that enough is being done to adapt or face the impacts related to thawing of the frozen ground by: |    |        |    |      |
| individuals (n = 52)                                                                                           |    |        |    |      |
| no                                                                                                             | 11 | (37)   | 11 | (50) |
| yes                                                                                                            | 6  | (20)   | 2  | (9)  |
| somewhat                                                                                                       | 13 | (43)   | 9  | (41) |
| the community (n = 52)                                                                                         |    |        |    |      |
| no                                                                                                             | 7  | (23)   | 6  | (27) |
| yes                                                                                                            | 12 | (40)   | 7  | (32) |
| somewhat                                                                                                       | 11 | (37)   | 9  | (41) |
| local authorities (n = 52)                                                                                     |    |        |    |      |
| no                                                                                                             | 8  | (27)   | 7  | (32) |
| yes                                                                                                            | 13 | (43)   | 7  | (32) |
| somewhat                                                                                                       | 9  | (30)   | 8  | (36) |
| regional authorities (n = 52)                                                                                  |    |        |    |      |

|                                                                                                                |                                       |              |        |        |        |
|----------------------------------------------------------------------------------------------------------------|---------------------------------------|--------------|--------|--------|--------|
|                                                                                                                | no                                    | 10           | (33,3) | 2      | (9)    |
|                                                                                                                | yes                                   | 13           | (43,3) | 8      | (36)   |
|                                                                                                                | somewhat                              | 7            | (23,3) | 12     | (55)   |
| national authorities (n = 52)                                                                                  |                                       |              |        |        |        |
|                                                                                                                | no                                    | 12           | (40)   | 4      | (18)   |
|                                                                                                                | yes                                   | 13           | (43)   | 9      | (41)   |
|                                                                                                                | somewhat                              | 5            | (17)   | 9      | (41)   |
| global community (n = 52)                                                                                      |                                       |              |        |        |        |
|                                                                                                                | no                                    | 13           | (43)   | 1      | (4)    |
|                                                                                                                | yes                                   | 11           | (37)   | 9      | (41)   |
|                                                                                                                | somewhat                              | 6            | (20)   | 12     | (55)   |
| In which ways do you think your community is best prepared to adapt to thawing                                 |                                       |              |        |        |        |
| of the frozen ground? (selected the option) * <sup>1</sup>                                                     |                                       |              |        |        |        |
|                                                                                                                | Hunting / fishing activities (n = 19) | 11           | (37)   | 8      | (36)   |
|                                                                                                                | Traditional knowledge (n = 28)        | 16           | (53)   | 12     | (55)   |
| The strongest need to adapt to thawing of the frozen ground in order to facilitate                             |                                       |              |        |        |        |
| day to day activities (selected the option) * <sup>2</sup>                                                     |                                       |              |        |        |        |
|                                                                                                                | Health (n = 15)                       | 8            | (27)   | 7      | (32)   |
|                                                                                                                | Housing (n = 18)                      | 11           | (37)   | 7      | (32)   |
|                                                                                                                | Hunting / fishing activities (n = 27) | 14           | (47)   | 13     | (59)   |
|                                                                                                                | Traditional knowledge (n = 32)        | 14           | (47)   | 18     | (82)   |
| Feeling of empowerment                                                                                         |                                       |              |        |        |        |
|                                                                                                                |                                       | no, somewhat |        | yes    |        |
|                                                                                                                |                                       | n            | (%)    | n      | (%)    |
| Do you feel that enough is being done to adapt or face the impacts related to thawing of the frozen ground by: |                                       |              |        |        |        |
| individuals (n = 53)                                                                                           |                                       |              |        |        |        |
|                                                                                                                | no                                    | 17           | (56)   | 5      | (23)   |
|                                                                                                                | yes                                   | 4            | (13)   | 4      | (18)   |
|                                                                                                                | somewhat                              | 10           | (32)   | 13     | (59)   |
| the community (n = 53)                                                                                         |                                       |              |        |        |        |
|                                                                                                                | no                                    | 10           | (32)   | 3      | (14)   |
|                                                                                                                | yes                                   | 10           | (32)   | 9      | (41)   |
|                                                                                                                | somewhat                              | 11           | (36)   | 10     | (45)   |
| local authorities (n = 53)                                                                                     |                                       |              |        |        |        |
|                                                                                                                | no                                    | 10           | (32)   | 6      | (27)   |
|                                                                                                                | yes                                   | 12           | (39)   | 8      | (36,5) |
|                                                                                                                | somewhat                              | 9            | (29)   | 8      | (36,5) |
| regional authorities (n = 53)                                                                                  |                                       |              |        |        |        |
|                                                                                                                | no                                    | 9            | (29)   | 4      | (18)   |
|                                                                                                                | yes                                   | 11           | (35,5) | 10     | (46)   |
|                                                                                                                | somewhat                              | 11           | (35,5) | 8      | (36)   |
| national authorities (n = 53)                                                                                  |                                       |              |        |        |        |
|                                                                                                                | no                                    | 10           | (32)   | 7      | (32)   |
|                                                                                                                | yes                                   | 12           | (39)   | 10     | (45)   |
|                                                                                                                | somewhat                              | 9            | (29)   | 5      | (23)   |
| global community (n = 53)                                                                                      |                                       |              |        |        |        |
|                                                                                                                | no                                    | 8            | (26)   | 6      | (27)   |
|                                                                                                                | yes                                   | 11           | (35)   | 10     | (46)   |
|                                                                                                                | somewhat                              | 12           | (39)   | 6      | (27)   |
| In which ways do you think your community is best prepared to adapt to thawing                                 |                                       |              |        |        |        |
| of the frozen ground? (selected the option) * <sup>1</sup>                                                     |                                       |              |        |        |        |
|                                                                                                                | Hunting / fishing activities (n = 19) | 11           | (35)   | 8      | (36)   |
|                                                                                                                | Traditional knowledge (n = 29)        | 19           | (61)   | 10     | (45)   |
| The strongest need to adapt to thawing of the frozen ground in order to facilitate                             |                                       |              |        |        |        |
| day to day activities (selected the option) * <sup>2</sup>                                                     |                                       |              |        |        |        |
|                                                                                                                | Health (n = 15)                       | 11           | (35)   | 4      | (18)   |
|                                                                                                                | Housing (n = 18)                      | 10           | (32)   | 8      | (36)   |
|                                                                                                                | Hunting / fishing activities (n = 28) | 16           | (52)   | 12     | (54)   |
|                                                                                                                | Traditional knowledge (n = 33)        | 20           | (65)   | 13     | (59)   |
| Self-rated health                                                                                              |                                       |              |        |        |        |
|                                                                                                                |                                       | low          |        | medium |        |
|                                                                                                                |                                       | high         |        |        |        |
|                                                                                                                |                                       | n            | (%)    | n      | (%)    |

|                                                                                                                                               |   |       |    |      |   |      |
|-----------------------------------------------------------------------------------------------------------------------------------------------|---|-------|----|------|---|------|
| Do you feel that enough is being done to adapt or face the impacts related to thawing of the frozen ground by:                                |   |       |    |      |   |      |
| individuals (n = 53)                                                                                                                          |   |       |    |      |   |      |
| no                                                                                                                                            | 0 | (0)   | 20 | (49) | 2 | (20) |
| yes                                                                                                                                           | 0 | (0)   | 7  | (17) | 1 | (10) |
| somewhat                                                                                                                                      | 2 | (100) | 14 | (34) | 7 | (70) |
| the community (n = 53)                                                                                                                        |   |       |    |      |   |      |
| no                                                                                                                                            | 0 | (0)   | 10 | (24) | 3 | (30) |
| yes                                                                                                                                           | 1 | (50)  | 14 | (34) | 4 | (40) |
| somewhat                                                                                                                                      | 1 | (50)  | 17 | (32) | 3 | (30) |
| local authorities (n = 53)                                                                                                                    |   |       |    |      |   |      |
| no                                                                                                                                            | 0 | (0)   | 3  | (32) | 3 | (30) |
| yes                                                                                                                                           | 1 | (50)  | 15 | (36) | 4 | (40) |
| somewhat                                                                                                                                      | 1 | (50)  | 13 | (32) | 3 | (30) |
| regional authorities (n = 53)                                                                                                                 |   |       |    |      |   |      |
| no                                                                                                                                            | 0 | (0)   | 11 | (27) | 2 | (20) |
| yes                                                                                                                                           | 1 | (50)  | 16 | (39) | 4 | (40) |
| somewhat                                                                                                                                      | 1 | (50)  | 14 | (34) | 4 | (40) |
| national authorities (n = 53)                                                                                                                 |   |       |    |      |   |      |
| no                                                                                                                                            | 0 | (0)   | 13 | (32) | 4 | (40) |
| yes                                                                                                                                           | 1 | (50)  | 17 | (41) | 4 | (40) |
| somewhat                                                                                                                                      | 1 | (50)  | 11 | (27) | 2 | (20) |
| global community (n = 53)                                                                                                                     |   |       |    |      |   |      |
| no                                                                                                                                            | 0 | (0)   | 10 | (24) | 4 | (40) |
| yes                                                                                                                                           | 1 | (50)  | 16 | (39) | 4 | (40) |
| somewhat                                                                                                                                      | 1 | (50)  | 15 | (37) | 2 | (20) |
| In which ways do you think your community is best prepared to adapt to thawing of the frozen ground? (selected the option) * <sup>1</sup>     |   |       |    |      |   |      |
| Hunting (fishing activities (n = 19)                                                                                                          | 0 | (0)   | 16 | (39) | 3 | (30) |
| Traditional knowledge (answered and selected the option: n = 29)                                                                              | 1 | (50)  | 21 | (51) | 7 | (70) |
| The strongest need to adapt to thawing of the frozen ground in order to facilitate day to day activities (selected the option) * <sup>2</sup> |   |       |    |      |   |      |
| Health (n = 15)                                                                                                                               | 0 | (0)   | 15 | (37) | 0 | (0)  |
| Housing (n = 18)                                                                                                                              | 0 | (0)   | 16 | (39) | 2 | (20) |
| Hunting / fishing activities (n = 28)                                                                                                         | 0 | (0)   | 24 | (59) | 4 | (40) |
| Traditional knowledge (n = 33)                                                                                                                | 2 | (100) | 27 | (67) | 4 | (40) |

\*a minimum of 15 participants chose the option reported. <sup>1</sup> Options: Health, housing, mobility, hunting / fishing activities, traditional knowledge, other. <sup>2</sup> Options: Health, housing, mobility, hunting / fishing activities, traditional knowledge, other

**Table S5.** Variables of interest and associations with demographic / perceived environmental factors ( $p < 0.1$ ).

|                                                         |  | Well-being      |         |           |                 |               |           |                 |
|---------------------------------------------------------|--|-----------------|---------|-----------|-----------------|---------------|-----------|-----------------|
|                                                         |  | OK              | good    | very good | not very good   | very good     |           |                 |
|                                                         |  | n (%)           | n (%)   | n (%)     | <i>p</i> -value | n (%)         | n (%)     | <i>p</i> -value |
| Being in nature for hunting (n = 53)                    |  |                 |         |           |                 |               |           |                 |
| never, rarely                                           |  |                 |         |           |                 | 13 (34)       | 1 (7)     | 0.080           |
| sometimes, very often                                   |  |                 |         |           |                 | 25 (66)       | 14 (93)   |                 |
| Being in nature for scientific activities (n = 53)      |  |                 |         |           |                 |               |           |                 |
| never, rarely                                           |  | 6 (46)          | 21 (84) | 10 (67)   | 0.050           |               |           |                 |
| sometimes, very often                                   |  | 7 (54)          | 4 (16)  | 5 (33)    |                 |               |           |                 |
| Challenges associated with economic activities (n = 53) |  |                 |         |           |                 |               |           |                 |
| not important, a little important                       |  | 2 (15)          | 9 (36)  | 7 (47)    | 0.081           |               |           |                 |
| important, very important                               |  | 7 (54)          | 15 (60) | 7 (47)    |                 |               |           |                 |
| I don't know                                            |  | 4 (31)          | 1 (4)   | 1 (6)     |                 |               |           |                 |
|                                                         |  | Quality of life |         |           |                 |               |           |                 |
|                                                         |  | OK              | good    | very good |                 | not very good | very good |                 |

|                                                                     | n (%)   | n (%)       | n (%)     | p-value | n (%)         | n (%)     | p-value |
|---------------------------------------------------------------------|---------|-------------|-----------|---------|---------------|-----------|---------|
| Being in nature for recreational activities (n = 52)                |         |             |           |         |               |           |         |
| never, rarely, sometimes                                            | 6 (75)  | 23 (85)     | 9 (53)    | 0.066   | 29 (83)       | 9 (53)    | 0.043   |
| very often                                                          | 2 (25)  | 4 (15)      | 8 (47)    |         | 6 (17)        | 8 (47)    |         |
| Challenges associated with economic activities (n = 52)             |         |             |           |         |               |           |         |
| not important, a little important                                   | 4 (50)  | 10 (37)     | 3 (18)    | 0.008   | 14 (40)       | 3 (18)    | 0.027   |
| important, very important                                           | 1 (12)  | 14 (52)     | 14 (82)   |         | 15 (43)       | 14 (82)   |         |
| I don't know                                                        | 3 (38)  | 3 (11)      | 0 (0)     |         | 6 (17)        | 0 (0)     |         |
| not important, a little important, important                        | 5 (63)  | 18 (67)     | 12 (71)   | 0.058   |               |           |         |
| very important                                                      | 0 (0)   | 6 (22)      | 5 (29)    |         |               |           |         |
| I don't know                                                        | 3 (37)  | 3 (11)      | 0 (0)     |         |               |           |         |
| Satisfaction with life                                              |         |             |           |         |               |           |         |
|                                                                     | OK      | good        | very good |         | not very good | very good |         |
|                                                                     | n (%)   | n (%)       | n (%)     | p-value | n (%)         | n (%)     | p-value |
| Being in nature for economic activities (n = 52)                    |         |             |           |         |               |           |         |
| never, rarely                                                       |         |             |           |         | 31 (97)       | 16 (80)   | 0.066   |
| sometimes, very often                                               |         |             |           |         | 1 (3)         | 4 (20)    |         |
| Challenges associated with economic activities (n = 52)             |         |             |           |         |               |           |         |
| not important, a little important                                   | 2 (40)  | 8 (30)      | 7 (35)    | 0.096   |               |           |         |
| important, very important                                           | 1 (20)  | 15 (55)     | 13 (65)   |         |               |           |         |
| I don't know                                                        | 2 (40)  | 4 (15)      | 0 (0)     |         |               |           |         |
| not important, a little important, important                        | 3 (60)  | 18 (67)     | 14 (70)   | 0.082   | 21 (66)       | 14 (70)   | 0.083   |
| very important                                                      | 0 (0)   | 5 (18)      | 6 (30)    |         | 5 (15)        | 6 (30)    |         |
| I don't know                                                        | 2 (40)  | 4 (15)      | 0 (0)     |         | 6 (19)        | 0 (0)     |         |
| Challenges associated with housing, buildings, roads (n = 52)       |         |             |           |         |               |           |         |
| not important, a little important                                   | 1 (20)  | 2 (7)       | 1 (5)     | 0.052   |               |           |         |
| important, very important                                           | 3 (60)  | 25 (93)     | 19 (95)   |         |               |           |         |
| I don't know                                                        | 1 (20)  | 0 (0)       | 0 (0)     |         |               |           |         |
| not important, a little important, important                        | 1 (20)  | 12 (44)     | 9 (45)    | 0.088   |               |           |         |
| very important                                                      | 3 (60)  | 15 (56)     | 11 (55)   |         |               |           |         |
| I don't know                                                        | 1 (20)  | 0 (0)       | 0 (0)     |         |               |           |         |
| Lost picking spots because they became flooded / submerged (n = 46) |         |             |           |         |               |           |         |
| no                                                                  | 3 (100) | 24 (89)     | 10 (63)   | 0.084   | 27 (90)       | 10 (63)   | 0.047   |
| yes                                                                 | 0 (0)   | 3 (11)      | 6 (37)    |         | 3 (10)        | 6 (37)    |         |
| Life balance                                                        |         |             |           |         |               |           |         |
|                                                                     |         |             |           |         | not strong    | strong    |         |
|                                                                     |         |             |           |         | n (%)         | n (%)     | p-value |
| Being in nature for recreational activities (n = 52)                |         |             |           |         |               |           |         |
| never, rarely                                                       |         |             |           |         | 16 (53)       | 6 (27)    | 0.089   |
| sometimes, very often                                               |         |             |           |         | 14 (47)       | 16 (73)   |         |
| never, rarely, sometimes                                            |         |             |           |         | 26 (87)       | 12 (55)   | 0.013   |
| very often                                                          |         |             |           |         | 4 (13)        | 10 (45)   |         |
| Lost picking spots because they became flooded / submerged (n = 46) |         |             |           |         |               |           |         |
| no                                                                  |         |             |           |         | 25 (93)       | 12 (63)   | 0.022   |
| yes                                                                 |         |             |           |         | 2 (7)         | 7 (37)    |         |
| Feeling of empowerment                                              |         |             |           |         |               |           |         |
|                                                                     | no      | somewhat at | yes       |         | no, somewhat  | yes       |         |

|                                                                                      | n (%)             | n (%)   | n (%)   | p-value | n (%)   | n (%)   | p-value |
|--------------------------------------------------------------------------------------|-------------------|---------|---------|---------|---------|---------|---------|
| Gender (n = 53)                                                                      |                   |         |         |         |         |         |         |
| female                                                                               | 9 (82)            | 13 (65) | 8 (36)  | 0.030   | 22 (71) | 8 (36)  | 0.023   |
| male                                                                                 | 2 (18)            | 7 (35)  | 14 (64) |         | 9 (29)  | 14 (64) |         |
| Being in nature for fishing (n = 51)                                                 |                   |         |         |         |         |         |         |
| never, rarely                                                                        | 6 (55)            | 6 (30)  | 3 (15)  | 0.075   |         |         |         |
| sometimes, very often                                                                | 5 (45)            | 14 (70) | 17 (85) |         |         |         |         |
| Being in nature for picking berries, mushrooms (n = 53)                              |                   |         |         |         |         |         |         |
| never, rarely, sometimes                                                             | 5 (45)            | 14 (70) | 7 (32)  | 0.049   | 19 (61) | 7 (32)  | 0.051   |
| very often                                                                           | 6 (55)            | 6 (30)  | 15 (68) |         | 12 (39) | 15 (68) |         |
| Thawing is impacting ability to obtain food / other resources from the land (n = 52) |                   |         |         |         |         |         |         |
| no                                                                                   | 0 (0)             | 5 (26)  | 2 (9)   | 0.084   |         |         |         |
| somewhat                                                                             | 3 (27)            | 7 (37)  | 12 (55) |         |         |         |         |
| yes                                                                                  | 8 (73)            | 7 (37)  | 8 (36)  |         |         |         |         |
|                                                                                      | Self-rated health |         |         |         |         |         |         |
|                                                                                      | low               |         | medium  |         | high    |         |         |
|                                                                                      | n (%)             | n (%)   | n (%)   | n (%)   | n (%)   | n (%)   | p-value |
| Being in the natural environment for hunting (n = 53)                                |                   |         |         |         |         |         |         |
| never, rarely                                                                        |                   |         | 2 (100) | 11 (27) | 1 (10)  |         | 0.042   |
| sometimes, very often                                                                |                   |         | 0 (0)   | 30 (73) | 9 (90)  |         |         |
| Being in nature for picking berries, mushrooms (n = 53)                              |                   |         |         |         |         |         |         |
| never, rarely                                                                        |                   |         | 2 (100) | 6 (15)  | 1 (10)  |         | 0.028   |
| sometimes, very often                                                                |                   |         | 0 (0)   | 35 (85) | 9 (90)  |         |         |
| Challenges associated with economic activities (n = 53)                              |                   |         |         |         |         |         |         |
| not important, a little important, important                                         |                   |         | 0 (0)   | 27 (66) | 9 (90)  |         | 0.035   |
| very important                                                                       |                   |         | 2 (100) | 9 (22)  | 0 (0)   |         |         |
| I don't know                                                                         |                   |         | 0 (0)   | 5 (12)  | 1 (10)  |         |         |

Statistical analysis was conducted using original groups and reclassifications as follows:

1. Age was reclassified into three groups: 18 - 34 years, 35 - 54 and over 55 years.
2. Profession was reclassified as follows: Public sector / private sector / hunter and fisher / not currently employed (unemployed, retired, homemaker). The group "other" was manually checked and answers were relocated into the groups of public sector, private sector, and hunter / fisher based on the information that was provided.

**Table S6.** Variables of interest and associations with factors describing specific impacts at the individual and community levels ( $p < 0.1$ ).

|                                                                                | Self-rated quality of life |         |          |       |           |       |               |         |
|--------------------------------------------------------------------------------|----------------------------|---------|----------|-------|-----------|-------|---------------|---------|
|                                                                                | OK                         |         | good     |       | very good |       | not very good |         |
|                                                                                | n (%)                      | n (%)   | n (%)    | n (%) | n (%)     | n (%) | n (%)         | p-value |
| During the past 10 years, the thawing of the frozen ground has led to (n = 50) |                            |         |          |       |           |       |               |         |
| positive changes                                                               | 0 (0)                      | 5 (19)  | 0 (0)    | 0.093 |           |       |               |         |
| negative changes                                                               | 7 (100)                    | 21 (81) | 17 (100) |       |           |       |               |         |
| Fires mainly cause the thawing of the frozen ground (n = 11)                   |                            |         |          |       |           |       |               |         |
| answered and option was selected                                               | 0 (0)                      | 9 (33)  | 2 (12)   | 0.067 |           |       |               |         |
| Decrease in snow depth mainly causes the thawing of the frozen ground (n = 4)  |                            |         |          |       |           |       |               |         |
| answered and option was selected                                               | 2 (25)                     | 0 (0)   | 2 (12)   | 0.032 |           |       |               |         |

|                                                                                                                                                                                  |   |       |    |      |   |      |       |    |       |   |      |       |
|----------------------------------------------------------------------------------------------------------------------------------------------------------------------------------|---|-------|----|------|---|------|-------|----|-------|---|------|-------|
| Yes, thawing of the frozen ground is connected to other problems of the individual / community: financial problems (n = 3)<br>answered yes and option was selected               | 0 | (0)   | 0  | (0)  | 3 | (27) | 0.068 | 0  | (0)   | 3 | (27) | 0.023 |
| Life balance                                                                                                                                                                     |   |       |    |      |   |      |       |    |       |   |      |       |
| not strong strong                                                                                                                                                                |   |       |    |      |   |      |       |    |       |   |      |       |
| n (%) n (%) p-value                                                                                                                                                              |   |       |    |      |   |      |       |    |       |   |      |       |
| Yes, thawing of the frozen ground is connected to other problems of the individual / community: Financial problems (n = 3)<br>answered yes and option was selected               |   |       |    |      |   |      |       | 0  | (0)   | 3 | (23) | 0.040 |
| Yes, thawing of the frozen ground is connected to other problems of the individual / community: Political problems (n = 5)<br>answered yes and option was selected               |   |       |    |      |   |      |       | 1  | (4)   | 4 | (31) | 0.047 |
| Feeling of empowerment                                                                                                                                                           |   |       |    |      |   |      |       |    |       |   |      |       |
| no somewhat yes no, somewhat yes                                                                                                                                                 |   |       |    |      |   |      |       |    |       |   |      |       |
| n (%) n (%) n (%) p-value n (%) n (%) p-value                                                                                                                                    |   |       |    |      |   |      |       |    |       |   |      |       |
| Fires mainly cause the thawing of the frozen ground (n = 11)<br>answered and option was selected                                                                                 | 1 | (9)   | 9  | (45) | 1 | (5)  | 0.002 | 10 | (32)  | 1 | (5)  | 0.017 |
| Decrease in snow depth mainly causes the thawing of the frozen ground (n = 4)<br>answered and option was selected                                                                | 0 | (0)   | 0  | (0)  | 4 | (18) | 0.066 | 0  | (0)   | 4 | (18) | 0.025 |
| Yes, thawing of the frozen ground is connected to other problems of the individual / community: Problems at work (n = 2)<br>answered yes and option was selected                 | 2 | (29)  | 0  | (0)  | 0 | (0)  | 0.033 |    |       |   |      |       |
| Yes, thawing of the frozen ground is connected to other problems of the individual / community: Infrastructure problems (n = 27)<br>answered yes and option was selected         | 7 | (100) | 12 | (86) | 8 | (53) | 0.029 | 19 | (91)  | 8 | (53) | 0.019 |
| Self-rated health                                                                                                                                                                |   |       |    |      |   |      |       |    |       |   |      |       |
| low medium high                                                                                                                                                                  |   |       |    |      |   |      |       |    |       |   |      |       |
| n (%) n (%) n (%) p-value                                                                                                                                                        |   |       |    |      |   |      |       |    |       |   |      |       |
| Yes, thawing of the frozen ground is connected to other problems of the individual / community: Problems with fresh-water supply (n = 9)<br>answered yes and option was selected |   |       |    |      |   |      |       | 1  | (100) | 4 | (14) | 0.006 |

**Table S7.** Variables of interest and associations with perceived adaptation factors ( $p = <0.1$ ).

|                                                                                                    | Well-being                                                                                  |      |      |      |           |        |         |               |      |           |        |       |
|----------------------------------------------------------------------------------------------------|---------------------------------------------------------------------------------------------|------|------|------|-----------|--------|---------|---------------|------|-----------|--------|-------|
|                                                                                                    | OK                                                                                          |      | good |      | very good |        | p-value | not very good |      | very good |        |       |
|                                                                                                    | n                                                                                           | (%)  | n    | (%)  | n         | (%)    |         | n             | (%)  | n         | (%)    |       |
| The community is best prepared to adapt to thawing of the frozen ground: health (n = 9)            |                                                                                             |      |      |      |           |        |         |               |      |           |        |       |
| answered and option was selected                                                                   |                                                                                             |      |      |      |           |        |         | 4             | (11) | 5         | (33)   | 0.097 |
| The community is best prepared to adapt to thawing of the frozen ground: housing (n = 9)           |                                                                                             |      |      |      |           |        |         |               |      |           |        |       |
| answered and option was selected                                                                   | 0                                                                                           | (0)  | 4    | (16) | 5         | (33)   | 0.068   | 4             | (11) | 5         | (33)   | 0.097 |
| The strongest need to adapt to thawing of the frozen ground: hunting / fishing activities (n = 28) |                                                                                             |      |      |      |           |        |         |               |      |           |        |       |
| answered and option was selected                                                                   | 8                                                                                           | (62) | 9    | (36) | 11        | (73)   | 0.066   | 17            | (45) | 11        | (73)   | 0.074 |
| Enough has been done to adapt or face impacts related to thawing by regional authorities (n = 53)  |                                                                                             |      |      |      |           |        |         |               |      |           |        |       |
| yes                                                                                                |                                                                                             |      |      |      |           |        |         | 17            | (45) | 4         | (27)   | 0.077 |
| somewhat                                                                                           |                                                                                             |      |      |      |           |        |         | 10            | (26) | 9         | (60)   |       |
| no                                                                                                 |                                                                                             |      |      |      |           |        |         | 11            | (29) | 2         | (13)   |       |
| Enough has been done to adapt or face impacts related to thawing by national authorities (n = 53)  |                                                                                             |      |      |      |           |        |         |               |      |           |        |       |
| yes                                                                                                | 5                                                                                           | (39) | 12   | (48) | 5         | (33.3) | 0.065   | 17            | (45) | 5         | (33.3) | 0.015 |
| somewhat                                                                                           | 2                                                                                           | (15) | 4    | (16) | 8         | (53.3) |         | 6             | (16) | 8         | (53.3) |       |
| no                                                                                                 | 6                                                                                           | (46) | 9    | (36) | 2         | (13.3) |         | 15            | (39) | 2         | (13.3) |       |
| Enough has been done to adapt or face impacts related to thawing by the global community (n = 53)  |                                                                                             |      |      |      |           |        |         |               |      |           |        |       |
| yes                                                                                                | 6                                                                                           | (46) | 10   | (40) | 5         | (33)   | 0.091   | 16            | (42) | 5         | (33)   | 0.025 |
| somewhat                                                                                           | 2                                                                                           | (15) | 7    | (28) | 9         | (60)   |         | 9             | (24) | 9         | (60)   |       |
| no                                                                                                 | 5                                                                                           | (39) | 8    | (32) | 1         | (7)    |         | 13            | (34) | 1         | (7)    |       |
|                                                                                                    | Self-rated quality of life                                                                  |      |      |      |           |        |         |               |      |           |        |       |
|                                                                                                    | OK                                                                                          |      | good |      | very good |        | p-value | not very good |      | very good |        |       |
|                                                                                                    | n                                                                                           | (%)  | n    | (%)  | n         | (%)    |         | n             | (%)  | n         | (%)    |       |
|                                                                                                    | The strongest need to adapt to thawing of the frozen ground: traditional knowledge (n = 32) |      |      |      |           |        |         |               |      |           |        |       |
| answered and option was selected                                                                   | 4                                                                                           | (50) | 13   | (48) | 15        | (88)   | 0.022   | 17            | (49) | 15        | (88)   | 0.007 |
| Enough has been done to adapt or face impacts related to thawing by the global community (n = 52)  |                                                                                             |      |      |      |           |        |         |               |      |           |        |       |
| yes                                                                                                |                                                                                             |      |      |      |           |        |         | 13            | (37) | 7         | (41)   | 0.038 |
| somewhat                                                                                           |                                                                                             |      |      |      |           |        |         | 9             | (26) | 9         | (53)   |       |
| no                                                                                                 |                                                                                             |      |      |      |           |        |         | 13            | (37) | 1         | (6)    |       |
|                                                                                                    | Self-rated satisfaction with life                                                           |      |      |      |           |        |         |               |      |           |        |       |
|                                                                                                    | OK                                                                                          |      | good |      | very good |        | p-value | not very good |      | very good |        |       |
|                                                                                                    | n                                                                                           | (%)  | n    | (%)  | n         | (%)    |         | n             | (%)  | n         | (%)    |       |
|                                                                                                    | The strongest need to adapt to thawing of the frozen ground: traditional knowledge (n = 32) |      |      |      |           |        |         |               |      |           |        |       |
| answered and option was selected                                                                   | 2                                                                                           | (40) | 13   | (48) | 17        | (85)   | 0.023   | 15            | (47) | 17        | (85)   | 0.008 |
| Enough has been done to adapt or face impacts related to thawing by regional authorities (n = 52)  |                                                                                             |      |      |      |           |        |         |               |      |           |        |       |
| yes                                                                                                | 1                                                                                           | (20) | 14   | (52) | 6         | (30)   | 0.020   | 15            | (47) | 6         | (30)   | 0.020 |



|                                                                                                   |          |        |         |         |              |         |         |       |         |       |
|---------------------------------------------------------------------------------------------------|----------|--------|---------|---------|--------------|---------|---------|-------|---------|-------|
|                                                                                                   | somewhat | 1 (20) | 6 (22)  | 12 (60) |              | 7 (22)  | 12 (60) |       |         |       |
|                                                                                                   | no       | 3 (60) | 7 (26)  | 2 (10)  |              | 10 (31) | 2 (10)  |       |         |       |
| Enough has been done to adapt or face impacts related to thawing by the global community (n = 52) |          |        |         |         |              |         |         |       |         |       |
|                                                                                                   | yes      | 0 (0)  | 13 (48) | 7 (35)  | 0.005        | 13 (41) | 7 (35)  | 0.027 |         |       |
|                                                                                                   | somewhat | 1 (20) | 6 (22)  | 11 (55) |              | 7 (22)  | 11 (55) |       |         |       |
|                                                                                                   | no       | 4 (80) | 8 (30)  | 2 (10)  |              | 12 (37) | 2 (10)  |       |         |       |
| <hr/>                                                                                             |          |        |         |         |              |         |         |       |         |       |
| Life balance                                                                                      |          |        |         |         |              |         |         |       |         |       |
| <hr/>                                                                                             |          |        |         |         |              |         |         |       |         |       |
|                                                                                                   |          |        |         |         | not strong   |         | strong  |       |         |       |
|                                                                                                   |          |        |         |         | n            | (%)     | n       | (%)   | p-value |       |
| <hr/>                                                                                             |          |        |         |         |              |         |         |       |         |       |
| The community is best prepared to adapt to thawing of the frozen ground: mobility (n = 3)         |          |        |         |         |              |         |         |       |         |       |
| answered and option was selected                                                                  |          |        |         |         |              | 0       | (0)     | 3     | (14)    | 0.070 |
| <hr/>                                                                                             |          |        |         |         |              |         |         |       |         |       |
| The strongest need to adapt to thawing of the frozen ground: traditional knowledge (n = 32)       |          |        |         |         |              |         |         |       |         |       |
| answered and option was selected                                                                  |          |        |         |         |              | 14      | (47)    | 18    | (82)    | 0.020 |
| <hr/>                                                                                             |          |        |         |         |              |         |         |       |         |       |
| Enough has been done to adapt or face impacts related to thawing by regional authorities (n = 52) |          |        |         |         |              |         |         |       |         |       |
| yes                                                                                               |          |        |         |         |              | 13      | (43.3)  | 8     | (36)    | 0.039 |
| somewhat                                                                                          |          |        |         |         |              | 7       | (23.3)  | 12    | (55)    |       |
| no                                                                                                |          |        |         |         |              | 10      | (33.3)  | 2     | (9)     |       |
| <hr/>                                                                                             |          |        |         |         |              |         |         |       |         |       |
| Enough has been done to adapt or face impacts related to thawing by the global community (n = 52) |          |        |         |         |              |         |         |       |         |       |
| yes                                                                                               |          |        |         |         |              | 11      | (37)    | 9     | (41)    | 0.002 |
| somewhat                                                                                          |          |        |         |         |              | 6       | (20)    | 12    | (55)    |       |
| no                                                                                                |          |        |         |         |              | 13      | (43)    | 1     | (4)     |       |
| <hr/>                                                                                             |          |        |         |         |              |         |         |       |         |       |
| Feeling of empowerment                                                                            |          |        |         |         |              |         |         |       |         |       |
| <hr/>                                                                                             |          |        |         |         |              |         |         |       |         |       |
|                                                                                                   |          |        | no      |         | no, somewhat |         | yes     |       |         |       |
|                                                                                                   |          |        | n       | (%)     | n            | (%)     | n       | (%)   | p-value |       |
| <hr/>                                                                                             |          |        |         |         |              |         |         |       |         |       |
| Enough has been done to adapt or face impacts related to thawing by individuals (n = 53)          |          |        |         |         |              |         |         |       |         |       |
| yes                                                                                               |          |        |         |         |              | 4       | (13)    | 4     | (18)    | 0.067 |
| somewhat                                                                                          |          |        |         |         |              | 10      | (32)    | 13    | (59)    |       |
| no                                                                                                |          |        |         |         |              | 17      | (55)    | 5     | (23)    |       |
| <hr/>                                                                                             |          |        |         |         |              |         |         |       |         |       |
| Self-rated health                                                                                 |          |        |         |         |              |         |         |       |         |       |
| <hr/>                                                                                             |          |        |         |         |              |         |         |       |         |       |
|                                                                                                   |          |        | low     |         | medium       |         | high    |       |         |       |
|                                                                                                   |          |        | n       | (%)     | n            | (%)     | n       | (%)   | p-value |       |
| <hr/>                                                                                             |          |        |         |         |              |         |         |       |         |       |
| The strongest need to adapt to thawing of the frozen ground: health (n = 15)                      |          |        |         |         |              |         |         |       |         |       |
| answered and option was selected                                                                  |          |        |         |         |              | 0       | (0)     | 15    | (37)    | 0.063 |
